# Supplementary material for: ISSEC: inferring contacts among protein secondary structure elements using deep object detection
Source: Springer Nature journal article supplement (doi:10.1186/s12859-020-03793-y), 2020-11-05
Supplement: 12859_2020_3793_MOESM1_ESM.pdf [file 12859_2020_3793_MOESM1_ESM.pdf]

---

---

## 1. Supplementary Methods

### 1.1. Input of the ISSEC

ISSEC's input includes the predicted probabilities of inter-residue contacts generated by CCMpred and 3-state secondary structure generated by PSIPRED [3]. The 3-state secondary structure was transformed into a matrix as follows: For a pair of residues  $i$  and  $j$ , we concatenate  $v_i$  and  $v_j$  into a single vector, which is used as input feature of this residue pair. Here,  $v_i$  refers to the probability distributions of 3-state secondary structure of residue  $i$ . Thus, we obtained a  $L \times L \times 7$  feature map as input.

### 1.2. Definition of inter-SSE contacts

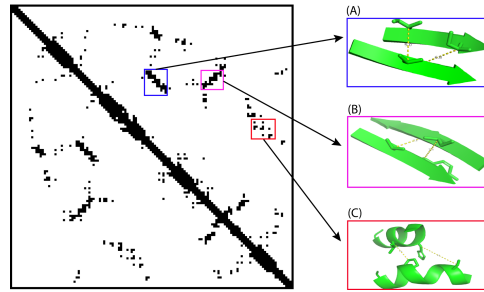

Figure 1: Inter-SSE contacts (right panel) and corresponding characteristic patterns in inter-residue contact map (left panel) for protein 1a1t. (A) a regular  $\beta$ - $\beta$  parallel contact between two  $\beta$ -strands, (B) a regular  $\beta$ - $\beta$  anti-parallel contact between two  $\beta$ -strands, (C) an  $\alpha$ - $\alpha$  contact between two  $\alpha$  helices.

In the study, we focused on 3 types of inter-SSE contacts, namely,  $\alpha$ - $\alpha$  contact,  $\beta$ - $\beta$  parallel contact, and  $\beta$ - $\beta$  anti-parallel contact (Supplementary Figure 1). The definitions of these three classes are listed below:

- *$\alpha$ - $\alpha$  contact*: A pair of helices  $H_1$  and  $H_2$  is defined as contact if there is a residue-residue contact between them. The helices should have at least 6 residues.
- *Parallel (anti-parallel)  $\beta$ - $\beta$  contact*: We adopted the definition used by bbcontacts [1], i.e., a continuous diagonal (sub-diagonal) in the inter-residue contact map is defined as  $\beta$ - $\beta$  parallel (anti-parallel) contact.

### 1.3. Loss Function and Implementation Details

ISSEC uses multi-task loss function [4, 2] that combines the loss of classification, localization and segmentation mask, i.e.,

$$L = L_{class} + L_{bbox} + L_{mask} \quad (1)$$

- $L_{class}$  represents the loss function over 4 classes ( $\alpha$ - $\alpha$  contact,  $\beta$ - $\beta$  parallel contact,  $\beta$ - $\beta$  anti-parallel contact, and background).

$$L_{class} = \frac{1}{4} \sum_{i=1}^4 [-p_i^* \log p_i - (1 - p_i^*) \log(1 - p_i)] \quad (2)$$

where  $p_i$  denotes the probability that the rectangle region of interest represents the  $i$ -th type of inter-SSE contact, and  $p_i^*$  represents the ground-truth.

- $L_{bbox}$  measures the difference between the predicted position and true position of the inter-SSE contact.

$$L_{bbox} = p_i^* \cdot \sum_{i \in \{x, y, w, h\}} L_1^{\text{smooth}}(b_i - b_i^*) \quad (3)$$

$$L_1^{\text{smooth}}(x) = \begin{cases} 0.5x^2 & \text{if } |x| < 1 \\ |x| - 0.5 & \text{otherwise} \end{cases} \quad (4)$$

where  $b_i$  represents one of four points of predicted bounding box, while  $b_i^*$  represents its groundtruth. Here,  $L_1^{\text{smooth}}$  is the smooth L1-norm loss. Using the  $L_{bbox}$  term, ISSEC could shrink the rectangle region and calculate the true position of the contacting SSEs.

- $L_{mask}$  is defined using the average binary cross-entropy loss as follows:

$$L_{mask} = -\frac{1}{m^2} \sum_{1 \leq i, j \leq m} [y_{ij} \log \hat{y}_{ij}^k + (1 - y_{ij}) \log(1 - \hat{y}_{ij}^k)] \quad (5)$$

The rectangle region of interest was first transformed into 4  $m \times m$  matrices using ROIAlign, where each matrix represent mask of a type of inter-SSE contact ( $\alpha$ - $\alpha$  contact,  $\beta$ - $\beta$  parallel contact,  $\beta$ - $\beta$  anti-parallel contact, and background). For each element  $(i, j)$  in the matrix,  $y_{ij}$  denotes the true mask whereas  $\hat{y}_{ij}^k$  denotes the predicted mask for type  $k$ .

**Hyper Parameters:** ResNet-50 was used as backbone to extract image features, all convolution filter were 3 x 3, except the output convolution filter were 1 x 1, we used ReLU in hidden layers.

**Model Implementation and Efficiency:** The optimization used the momentum optimizer with learning rate 0.002, with L2-norm regularization to prevent overfitting, and early stopping with max iteration of 100000. The whole algorithm is implemented using TensorFlow on a NVIDIA 1070 GPU, the batch size is set to 2 due to GPU limitation, and the training time is less than 15 hours.

## 2. Supplementary Tables and Figures

Table 1: Shapes and sizes of proposed rectangle regions in the feature maps. Here the shape of a rectangle is described using the ratio of length to width.

| No | Ratio of length to width | Size (in pixel) |
|----|--------------------------|-----------------|
| 1  | 0.5                      | 16              |
| 2  | 0.5                      | 32              |
| 3  | 0.5                      | 64              |
| 4  | 1.0                      | 16              |
| 5  | 1.0                      | 32              |
| 6  | 1.0                      | 64              |
| 7  | 2.0                      | 16              |
| 8  | 2.0                      | 32              |
| 9  | 2.0                      | 64              |

Table 2: Performance of CCMpred, DeepRN, and DeepRN+ISSEC on PSICOV118 dataset

| Method       | Short        |              |              |              | Medium       |              |              |              | Long         |              |              |              |
|--------------|--------------|--------------|--------------|--------------|--------------|--------------|--------------|--------------|--------------|--------------|--------------|--------------|
|              | $L/10$       | $L/5$        | $L/2$        | $L$          | $L/10$       | $L/5$        | $L/2$        | $L$          | $L/10$       | $L/5$        | $L/2$        | $L$          |
| CCMpred      | 0.468        | 0.318        | 0.178        | 0.120        | 0.540        | 0.375        | 0.198        | 0.123        | 0.714        | 0.591        | 0.384        | 0.242        |
| DeepRN       | 0.871        | 0.749        | 0.471        | 0.282        | 0.842        | 0.735        | 0.508        | 0.324        | 0.913        | 0.879        | 0.737        | 0.559        |
| DeepRN+ISSEC | <b>0.877</b> | <b>0.766</b> | <b>0.488</b> | <b>0.288</b> | <b>0.864</b> | <b>0.758</b> | <b>0.536</b> | <b>0.334</b> | <b>0.919</b> | <b>0.892</b> | <b>0.777</b> | <b>0.601</b> |

Table 3: Performance of CCMpred, DeepRN, and DeepRN+ISSEC on CASP11 dataset

| Method       | Short        |              |              |              | Medium       |              |              |              | Long         |              |              |              |
|--------------|--------------|--------------|--------------|--------------|--------------|--------------|--------------|--------------|--------------|--------------|--------------|--------------|
|              | $L/10$       | $L/5$        | $L/2$        | $L$          | $L/10$       | $L/5$        | $L/2$        | $L$          | $L/10$       | $L/5$        | $L/2$        | $L$          |
| CCMpred      | 0.378        | 0.293        | 0.187        | 0.128        | 0.426        | 0.334        | 0.220        | 0.153        | 0.472        | 0.416        | 0.326        | 0.244        |
| DeepRN       | 0.755        | 0.624        | 0.400        | 0.251        | <b>0.758</b> | 0.668        | 0.479        | 0.312        | 0.723        | 0.670        | 0.571        | 0.440        |
| DeepRN+ISSEC | <b>0.759</b> | <b>0.642</b> | <b>0.411</b> | <b>0.252</b> | 0.746        | <b>0.678</b> | <b>0.483</b> | <b>0.317</b> | <b>0.730</b> | <b>0.686</b> | <b>0.599</b> | <b>0.474</b> |

Table 4: Performance of CCMpred, DeepRN, and DeepRN+ISSEC on CASP13 dataset

| Method       | Short        |              |              |              | Medium       |              |              |              | Long         |              |              |              |
|--------------|--------------|--------------|--------------|--------------|--------------|--------------|--------------|--------------|--------------|--------------|--------------|--------------|
|              | $L/10$       | $L/5$        | $L/2$        | $L$          | $L/10$       | $L/5$        | $L/2$        | $L$          | $L/10$       | $L/5$        | $L/2$        | $L$          |
| CCMpred      | 0.304        | 0.253        | 0.170        | 0.138        | 0.347        | 0.277        | 0.190        | 0.141        | 0.326        | 0.302        | 0.218        | 0.153        |
| DeepRN       | <b>0.543</b> | 0.472        | 0.370        | 0.262        | 0.558        | <b>0.506</b> | 0.370        | <b>0.272</b> | 0.497        | 0.450        | 0.339        | 0.253        |
| DeepRN+ISSEC | 0.534        | <b>0.505</b> | <b>0.371</b> | <b>0.262</b> | <b>0.584</b> | 0.491        | <b>0.372</b> | 0.263        | <b>0.517</b> | <b>0.451</b> | <b>0.350</b> | <b>0.269</b> |

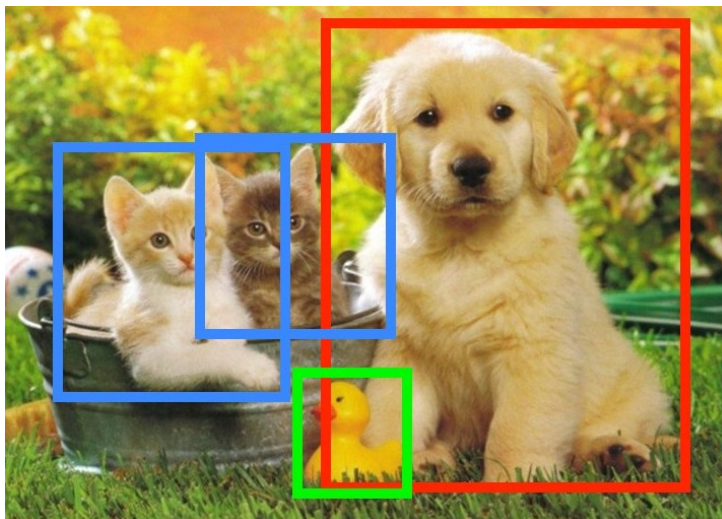

Figure 2: An example of object detection in image. This image contains two cats, a dog and a duck, and these objects overlap considerably.

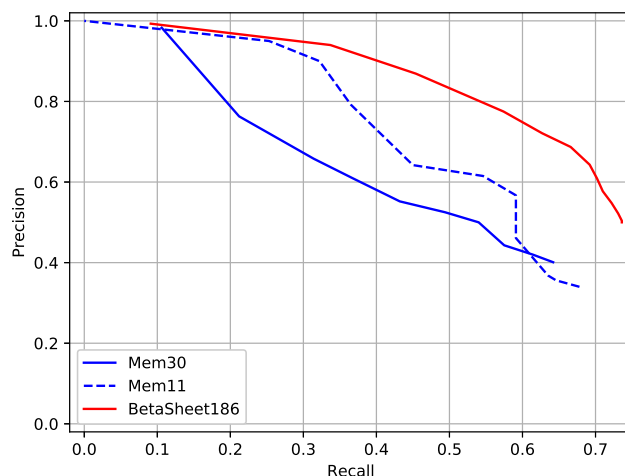

Figure 3: Performance of ISSEC on Mem30, Mem11 and BetaSheet186 dataset.

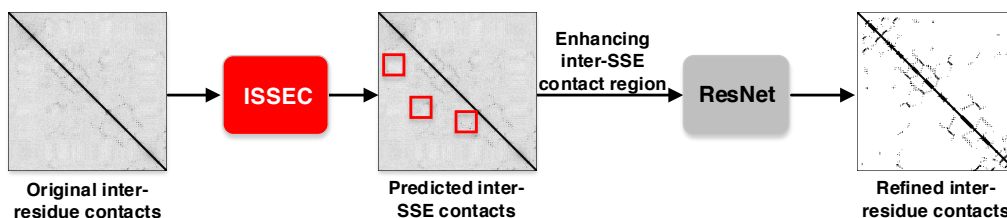

Figure 4: Improving inter-residue contacts by re-weighting the loss function of Xu's model based the predicted inter-SSE contacts by our ISSEC. In Xu's model, the CCMpred was fed into the ResNet, and then a improved inter-residue contact was predicted. In our re-weighting strategy, the CCMpred was also fed into ISSEC to predicted inter-SSE contacts (Red boxes), which were then used to re-weighting loss function of Xu's model.



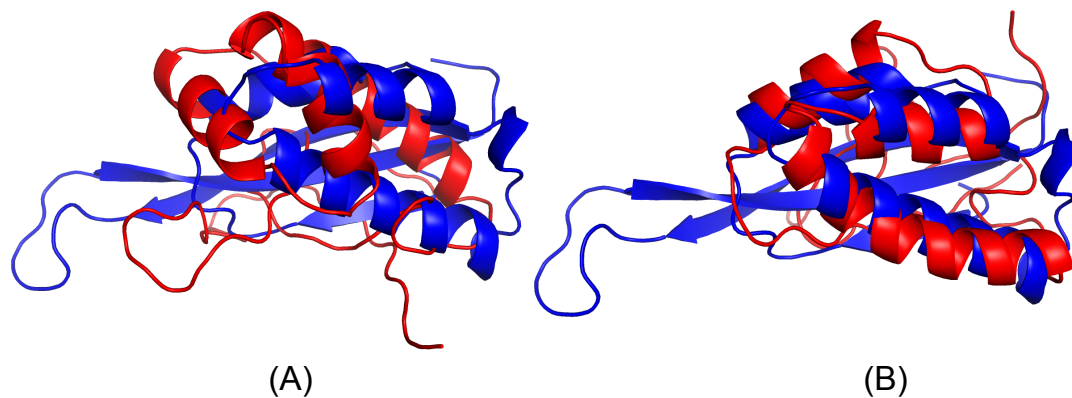

Figure 5: Predicted structure for protein 1i4jA by using CONFOLD (A) and CONFOLD+ISSEC (B). Here the predicted structures are shown in red whereas the native structure is shown in blue.

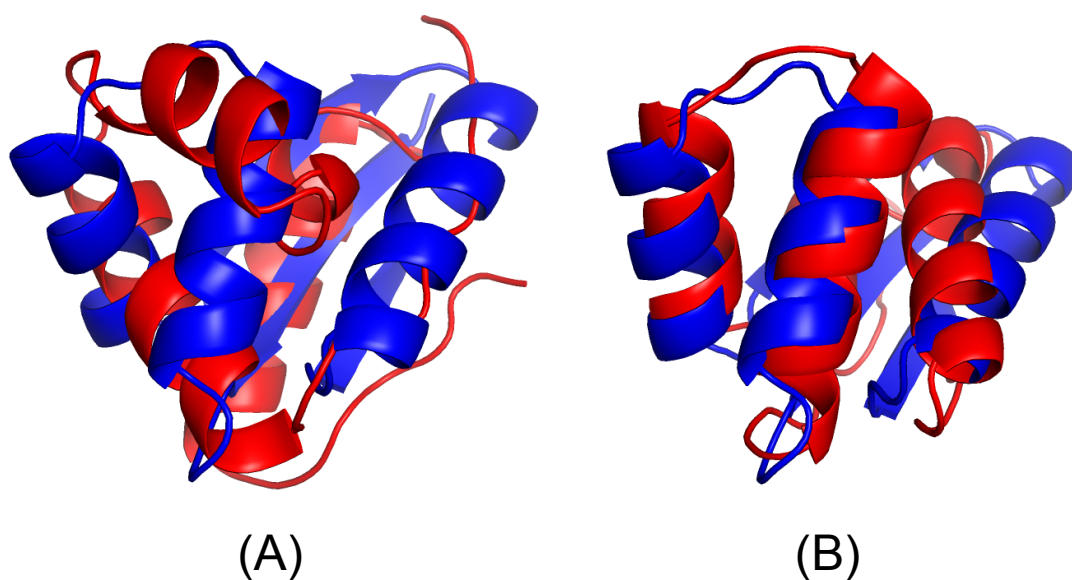

Figure 6: Predicted structure for protein 1ctfA by using CONFOLD (A) and CONFOLD+ISSEC (B). Here the predicted structures are shown in red whereas the native structure is shown in blue.

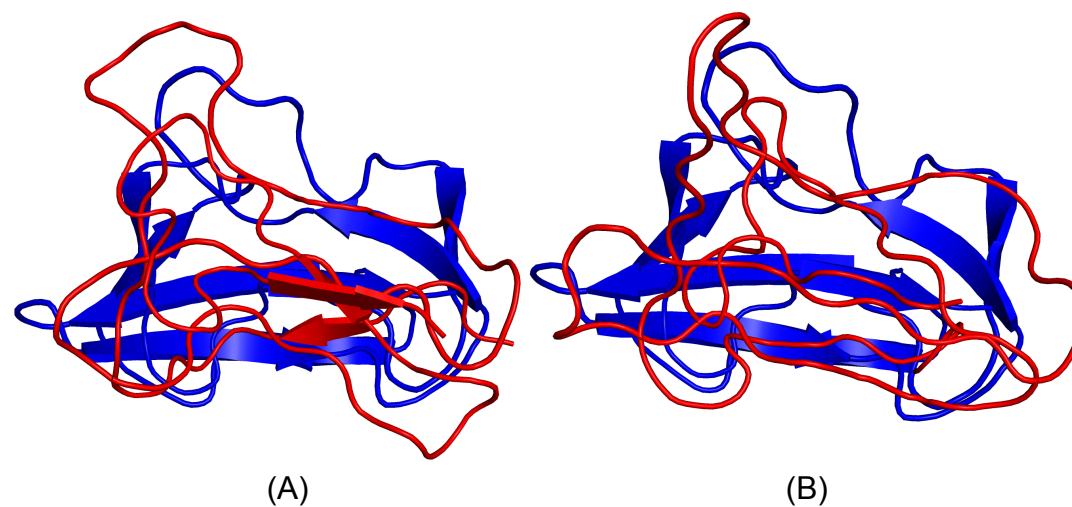

Figure 7: Predicted structure for protein 1bd0A by using CONFOLD (A) and CONFOLD+ISSEC (B). Here the predicted structures are shown in red whereas the native structure is shown in blue.

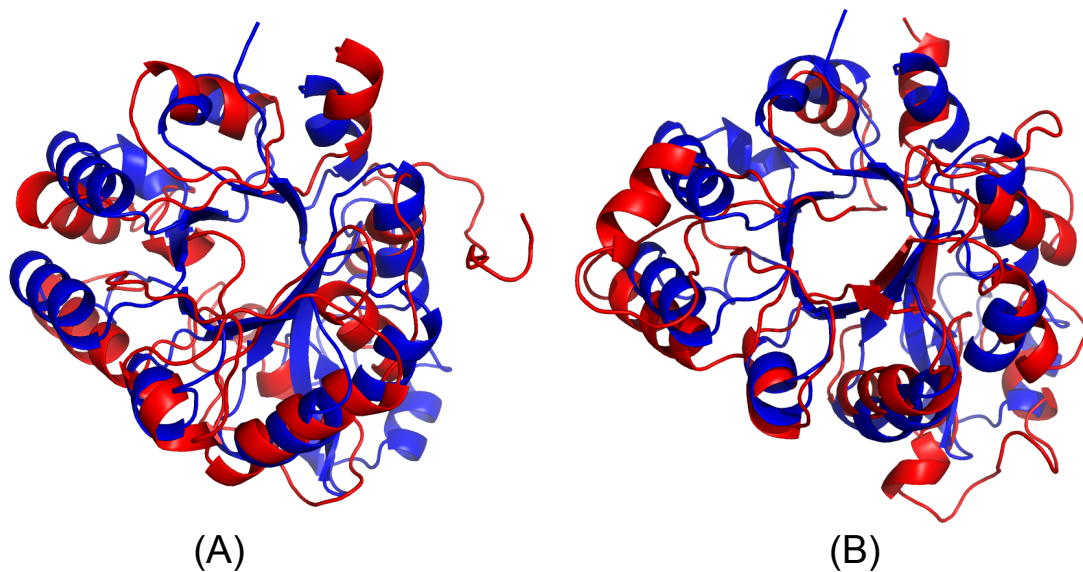

Figure 8: Predicted structure for protein 1o1zA by using CONFOLD (A) and CONFOLD+ISSEC (B). Here the predicted structures are shown in red whereas the native structure is shown in blue.

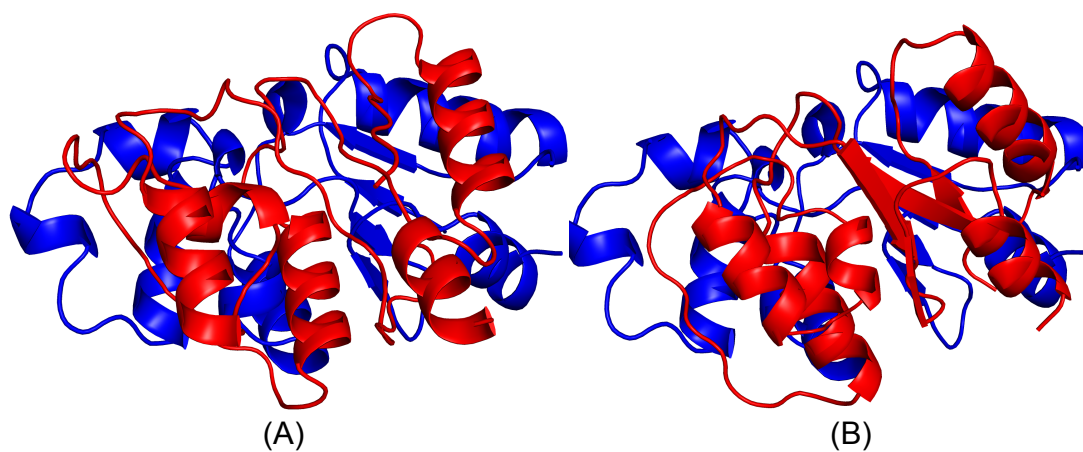

Figure 9: Predicted structure for protein 1rw1A by using CONFOLD (A) and CONFOLD+ISSEC (B). Here the predicted structures are shown in red whereas the native structure is shown in blue.

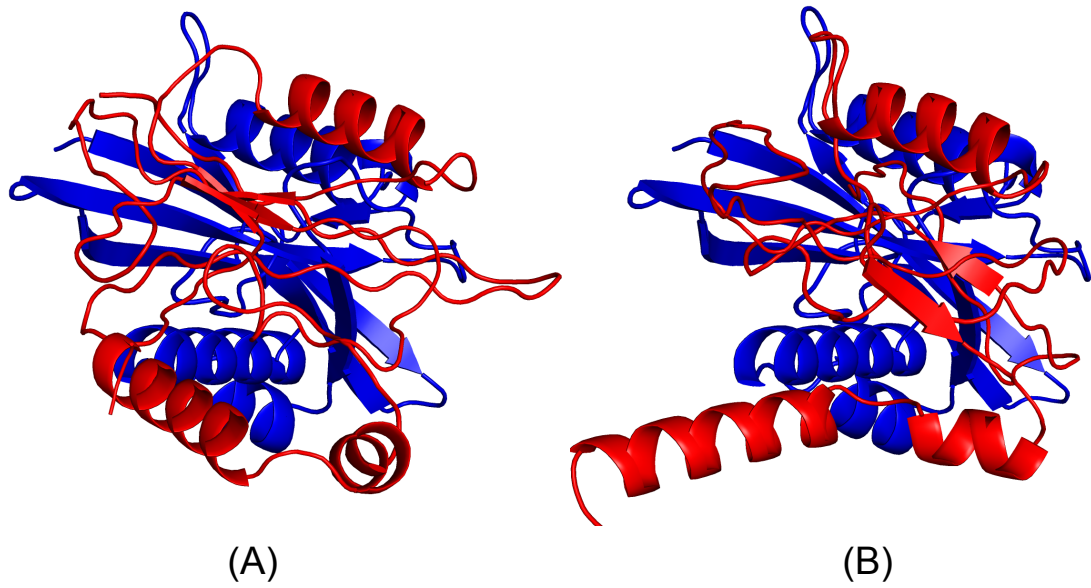

Figure 10: Predicted structure for protein 1ktgA by using CONFOLD (A) and CONFOLD+ISSEC (B). Here the predicted structures are shown in red whereas the native structure is shown in blue.

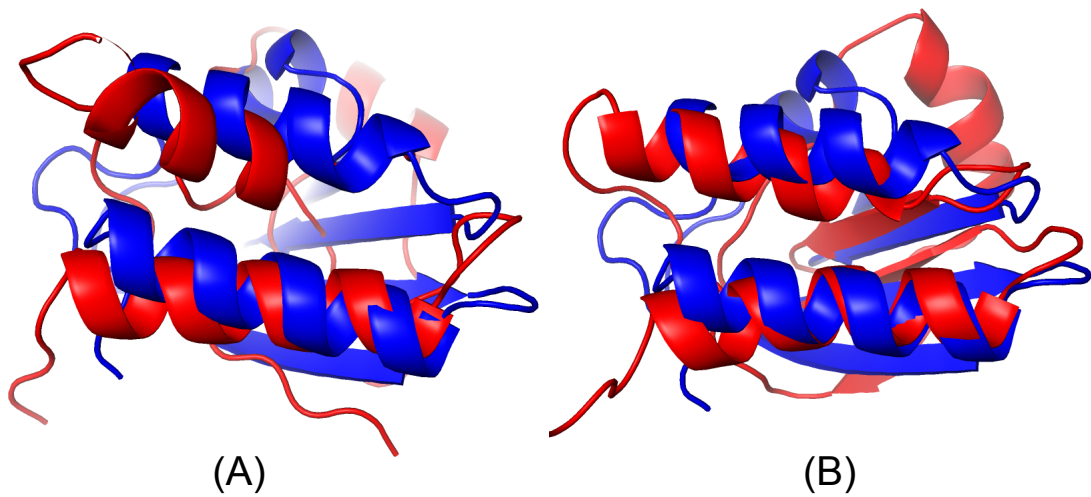

Figure 11: Predicted structure for protein 1pchA by using CONFOLD (A) and CONFOLD+ISSEC (B). Here the predicted structures are shown in red whereas the native structure is shown in blue.

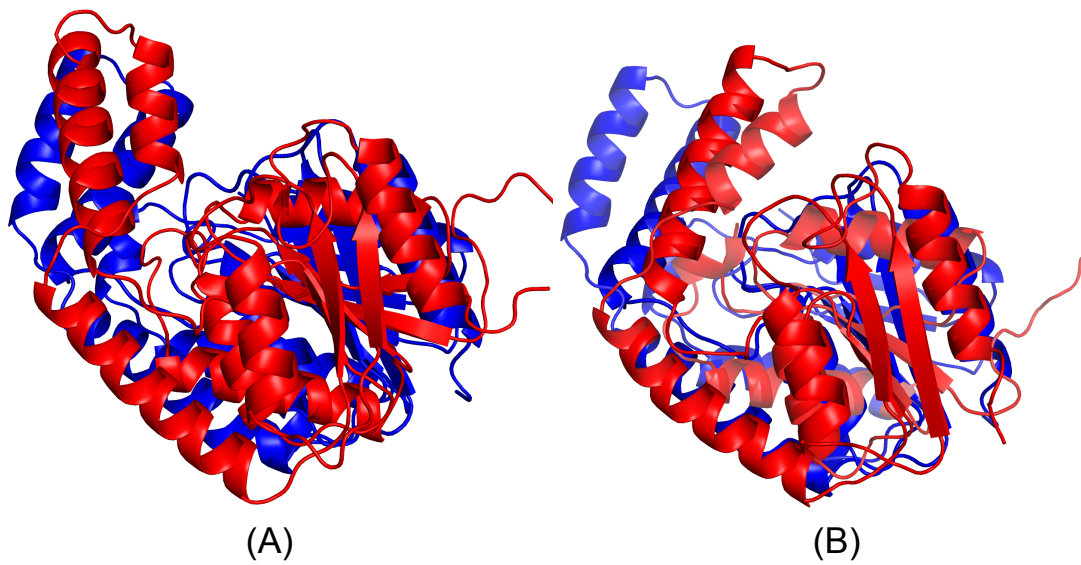

Figure 12: Predicted structure for protein 1tqhA by using CONFOLD (A) and CONFOLD+ISSEC (B). Here the predicted structures are shown in red whereas the native structure is shown in blue.

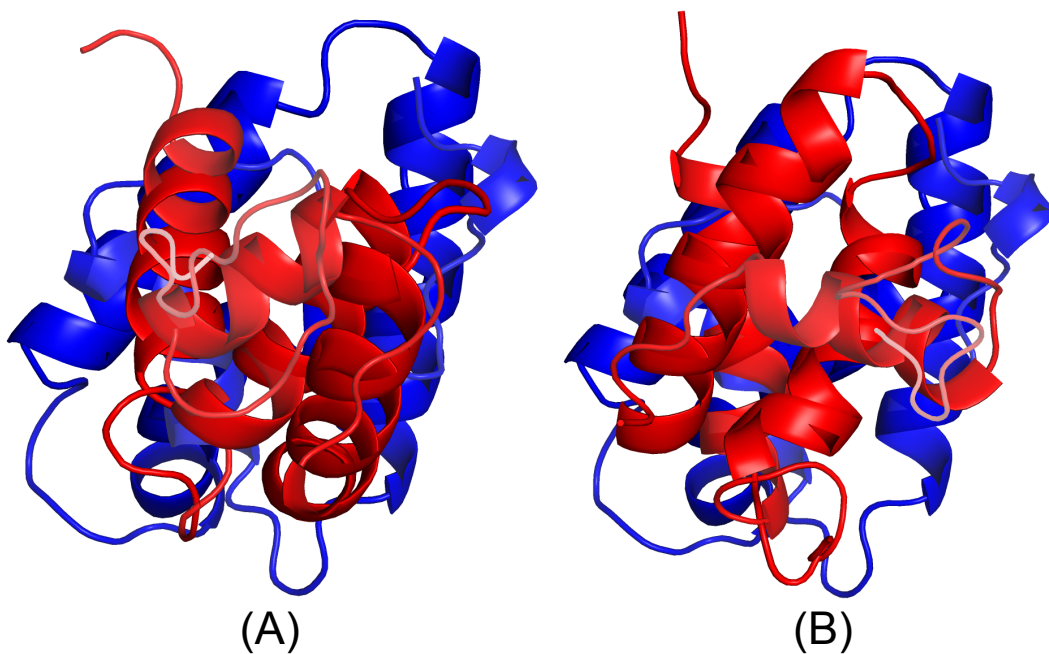

Figure 13: Predicted structure for protein 1fk5A by using CONFOLD (A) and CONFOLD+ISSEC (B). Here the predicted structures are shown in red whereas the native structure is shown in blue.

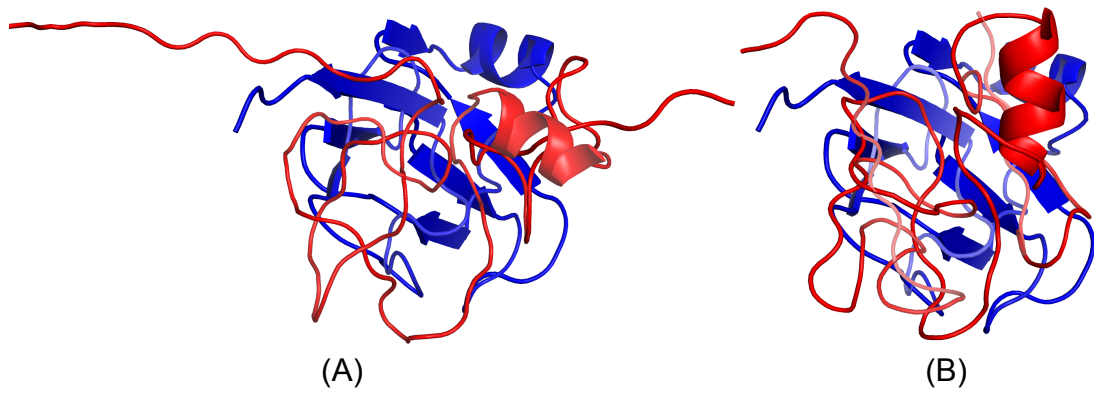

Figure 14: Predicted structure for protein 1npsA by using CONFOLD (A) and CONFOLD+ISSEC (B). Here the predicted structures are shown in red whereas the native structure is shown in blue.

- [1] Andreani, J. and Söding, J. (2015). bbcontacts: prediction of  $\beta$ -strand pairing from direct coupling patterns. Bioinformatics, **31**(11), 1729–1737.
- [2] He, K., Gkioxari, G., Dollár, P., and Girshick, R. (2017). Mask r-cnn. In Computer Vision (ICCV), 2017 IEEE International Conference on, pages 2980–2988. IEEE.
- [3] McGuffin, L. J., Bryson, K., and Jones, D. T. (2000). The PSIPRED protein structure prediction server. Bioinformatics, **16**(4), 404–405.
- [4] Ren, S., He, K., Girshick, R., and Sun, J. (2015). Faster r-cnn: Towards real-time object detection with region proposal networks. In Advances in neural information processing systems, pages 91–99.
